# Supplementary material
Source: PubMed Central journal article supplement (PMC4921315)
Supplement: NIHMS766483-supplement.pdf [file NIHMS766483-supplement.pdf]

**Supplemental Table A. Participant Characteristics for the Study Population**

| Characteristic at Baseline Exam                                    | Participants with Retinopathy Data (n=4966) | Participants without Retinopathy Data (n=798) | p-value*      |
|--------------------------------------------------------------------|---------------------------------------------|-----------------------------------------------|---------------|
| Mean Age in years                                                  | 76.4 (5.5)                                  | 80.8 (6.6)                                    | < <b>0.01</b> |
| Male                                                               | 43.2% (2144)                                | 36.8% (294)                                   | < <b>0.01</b> |
| Education Level, Completed Secondary or More                       | 76.9% (3787)                                | 69.3% (280)                                   | <b>0.03</b>   |
| Former Smoker                                                      | 45.1% (2236)                                | 29.9% (182)                                   | < <b>0.01</b> |
| Current Smoker                                                     | 12.1% (601)                                 | 13.5% (82)                                    | < <b>0.01</b> |
| Current Alcohol Consumption                                        | 65.1% (3214)                                | 53.8% (326)                                   | <b>0.01</b>   |
| Hypertension                                                       | 80.9% (4018)                                | 82.4% (619)                                   | 0.18          |
| Mean Diastolic Blood Pressure, mmHG                                | 74.0 (9.7)                                  | 72.5 (10.7)                                   | 0.55          |
| Mean Systolic Blood Pressure, mmHG                                 | 142.4 (20.3)                                | 142.6 (24.3)                                  | 0.05          |
| Mean Body Mass Index                                               | 27.0 (4.4)                                  | 26.9 (4.9)                                    | 0.09          |
| Self-Reported Health Status, Poor                                  | 5.5% (274)                                  | 14.6% (107)                                   | < <b>0.01</b> |
| Cognitive Status, Impaired                                         | 14.3% (702)                                 | 40.4% (241)                                   | < <b>0.01</b> |
| Walking Disability                                                 | 17.6% (870)                                 | 42.9% (261)                                   | < <b>0.01</b> |
| Median Number of Medications (Range)                               | 4.0 (0-20)                                  | 5.0 (0-21)                                    | < <b>0.01</b> |
| Mean High-Density Lipoprotein Cholesterol, mmol/L                  | 1.6 (0.4)                                   | 1.6 (0.5)                                     | < <b>0.01</b> |
| Mean Total Cholesterol, mmol/L                                     | 5.6 (1.2)                                   | 5.7 (1.2)                                     | 0.89          |
| History of Angina, by Self-Report                                  | 14.5% (706)                                 | 11.9% (63)                                    | 0.09          |
| History of Cardiovascular Disease, by Self-Report                  | 23.7% (1173)                                | 26.1% (192)                                   | 0.45          |
| Record of Clinical Cardiovascular Event                            | 15.6% (766)                                 | 14.3% (113)                                   | 0.66          |
| Clinical Stroke <sup>a</sup>                                       | 9.5% (468)                                  | 17.5% (138)                                   | < <b>0.01</b> |
| HbA1c $\geq$ 6.5%                                                  | 5.3% (243)                                  | 6.7% (47)                                     | 0.07          |
| Diabetes Mellitus <sup>b</sup>                                     | 10.1% (503)                                 | 12.6% (100)                                   | <b>0.02</b>   |
| Microalbuminuria <sup>c</sup>                                      | 8.8% (430)                                  | 9.2% (38)                                     | 0.90          |
| Chronic Kidney Disease <sup>d</sup>                                | 30.8% (1527)                                | 37.4% (297)                                   | 0.54          |
| Cerebral Microbleeds                                               | 11.4% (494)                                 | 13.4% (47)                                    | 0.48          |
| Mean Total Brain Tissue Volume (corrected for intracranial volume) | 72.0 (4.1)                                  | 70.9 (4.5)                                    | < <b>0.01</b> |
| Brain Infarcts, Single                                             | 15.5% (685)                                 | 16.4% (58)                                    | 0.90          |
| Brain Infarcts, Multiple ( $\geq$ 2)                               | 15.4% (679)                                 | 15.8% (56)                                    | 0.65          |

Data are presented as % (N) or mean (SD) except where noted as median (range). \* Adjusted for age and sex.

<sup>a</sup> Clinical stroke was defined as having a stroke, as determined from hospital records, before entry to or during the AGES study up to 31 December 2012.

<sup>b</sup> Diabetes mellitus was defined as the self-reported history of diabetes, use of glucose-modifying medications, or HbA1c  $\geq$  6.5%.

<sup>c</sup> Microalbuminuria was defined as a urine albumin: creatinine ratio (UACR)  $\geq$  30 mg/g.

<sup>d</sup> Chronic kidney disease was defined as an estimated glomerular filtration rate (eGFR) < 60 ml/min/1.73m<sup>2</sup>.

Other variables, including marital status, physical activity level, depressive symptomology, self-reported history of falls, hearing impairment, cod liver oil use, antidepressant use, aspirin use, glucose level, vitamin D level, self-reported history of cancer or arthritis, hand osteoarthritis, and coronary calcium were also considered, but due to the lack of significance in preliminary analyses, were not included.
